# Supplementary material for: The Plasmodium palmitoyl-S-acyl-transferase DHHC2 is essential for ookinete morphogenesis and malaria transmission
Source: PubMed Central journal article supplement (PMC4630622; doi:10.1038/srep16034), 2015-11-03
Supplement: srep16034-s1.pdf [file srep16034-s1.pdf]

**The *Plasmodium* palmitoyl-S-acyl-transferase DHHC2 is essential for ookinete morphogenesis and malaria transmission**

**Jorge M. Santos, Jessica Kehrer, Blandine Franke-Fayard, Friedrich Frischknecht, Chris J. Janse, Gunnar R. Mair**

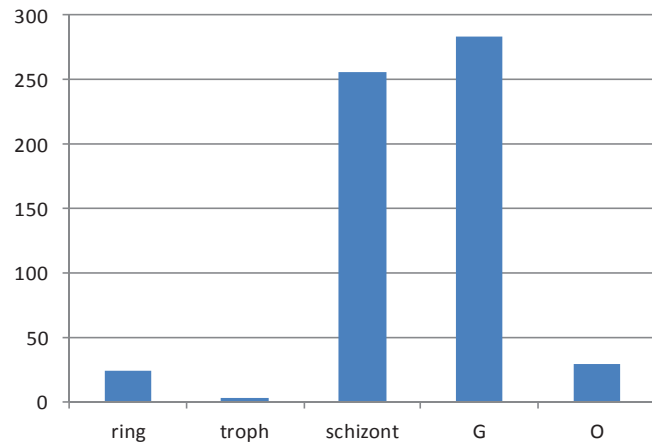

**Supplementary Figure S1.** PBANKA\_010830 transcript levels as reads per kilobase of exon model per million mapped reads (RPKM). Ring 4-hour ring stage; troph 16-hour trophozoite; schizont 22-hour schizont; G gametocytes; O 24-hour ookinete; Otto et al. 2014

```

PBANKA_010830 1 MTHKYNQIISHGQPEKKRGGSTFIFIVFFLSFIYLYGTGIVLRSWFIPYR
PCHAS_010890 1 MTHKYNQIISHGQPEKKRGGSTFIFIVFFLSFIYLYGTGIVLRSWFIPYR
PY17X_0109900 1 MTHKYNQIISHGQPEKKRGGSTFIFIVFFLSFIYLYGTGIVLRSWFIPYR
PKNH_1140400 1 ----WQPLQGQTEKKKRASIFIFIVFFVQAFIYVGYTGIVLRSWFIPYR
PVX_113640 1 MRPKYMQPAQGQTEKKRGGSTFIFIVFFLTFIYLYGTGIVLRSWFIPYR
PF3D7_0609800 1 MRPKYMQASQGQKEKKRGGSTFIFIVFFLSFIYLYGTGIVLRSWFIPYR
PRCDC_0608500 1 MRPKYMQASQGQKEKKRGGSTFIFIVFFLSFIYLYGTGIVLRSWFIPYR

PBANKA_010830 51 SGSLTIAIVFHIFFLFLLSFIKCASTDPGKVP RNWGFYVGGDDVKRRRYC
PCHAS_010890 51 SGSLTIAIAFHIFFLFLLSFIKCASTDPGKVP RNWGFYVGGDDVKRRRYC
PY17X_0109900 51 SGSLTIAIAFHIFFLFLLSFIKCASTDPGKVP RNWGFYVGGDDVKRRRYC
PKNH_1140400 46 SGSLTIAALFHVFFFLFLLSFIKCASTDPGKVP RNWGFYVGGDDVKRRRYC
PVX_113640 51 SGSFTIAALFHVFFFLFLLSFIKCASTDPGKVP RNWGFYVGGDDVKRRRYC
PF3D7_0609800 51 SGSFTIAVTFHIFFLFLLSFIKCASTDPGKVP RNWGFYVGGDDVKRRRYC
PRCDC_0608500 51 TGSFTIAVTFHIFFLFLLSFIKCASTDPGKVP RNWGFYVGGDDVKRRRYC

*****

PBANKA_010830 101 KICNVWKPDRTHHCSACNRCVLNMDHHC PWINNCVGFVNRFFMQLLFYG
PCHAS_010890 101 KICNVWKPDRTHHCSACNRCVLNMDHHC PWINNCVGFVNRFFMQLLFYG
PY17X_0109900 101 KICNVWKPDRTHHCSACNRCVLNMDHHC PWINNCVGFVNRFFMQLLFYG
PKNH_1140400 96 KICNVWKPDRTHHCSACNRCVLNMDHHC PWINNCVGFVNRFFMQLLFYG
PVX_113640 101 KICNVWKPDRTHHCSACNRCVLNMDHHC PWINNCVGFVNRFFMQLLFYG
PF3D7_0609800 101 KICNVWKPDRTHHCSACNRCVLNMDHHC PWINNCVGFVNRFFMQLLFYG
PRCDC_0608500 101 KICNVWKPDRTHHCSACNRCVLNMDHHC PWINNCVGFVNRFFMQLLFYG

PBANKA_010830 151 LILCLFMVATQTFHYIFIDNINAYMIDGFGQENNSFVALEYTYASIVLFLTF
PCHAS_010890 151 LILCLFMVATQTFHYIFIDNINAYMIDGFGQENNSFVALEYTYASIVLFLTF
PY17X_0109900 151 LILCLFMVATQTFHYIFIDNINAYMIDGFGQENNSFVALEYTYASIVLFLTF
PKNH_1140400 146 LILCLFIVAVQTFHYIFIDNINAYIEDGFGHKSSFVALEYTYASIVLFLTF
PVX_113640 151 LILCLFMVALQTFYIFIDNINAYIEDGFGHKSSFVALEYTYASIVLFLTF
PF3D7_0609800 151 LILCLFI IAVQTFHYIFIDNINAYIEDGFGQEKSSFVALEYTYASIVLFLTF
PRCDC_0608500 151 LILCLFI IAVQTFHYIFIDNINAYIEDGFGQEKSSFVALEYTYASIVLFLTF

PBANKA_010830 201 VLIFALVPFTKFHLKLISKNSTTIENMDIYNQDYNINVGCEDNAKQVFG
PCHAS_010890 201 VLIFALVPFTKFHLKLISKNSTTIENMDIYNQDYNINVGCEDNAKQVFG
PY17X_0109900 201 VLIFALVPFTKFHLKLISKNSTTIENMDIYNQDYNINVGCEDNAKQVFG
PKNH_1140400 196 VLIFALVPFTKFHLKLISKNSTTIENMDIYNQDYNINVGCEDNAKQVFG
PVX_113640 201 VLIFALVPFTKFHLKLISKNSTTIENMDIYNQDYNINVGCEDNAKQVFG
PF3D7_0609800 201 VLIFALVPFTKFHLKLISKNSTTIENMDIYSQDYNIYNVGCEDNAKQVFG
PRCDC_0608500 201 VLIFALVPFTKFHLKLISKNSTTIENMDIYSQDYNIYNVGCEDNAKQVFG

PBANKA_010830 251 NNILCWMCPCHCISNRPAGDGVRWRVSI SHGSNI
PCHAS_010890 251 NNILCWMCPCCISNRPAGDGVRWRVSI SQGTNI
PY17X_0109900 251 NNILCWMCPCHCISNRPAGDGVRWRVSI SHGNNI
PKNH_1140400 246 NNILCWMCPFH CISNRPAGDGVRWRVSAHENII
PVX_113640 251 NNILCWMCPFH CISNRPAGDGVRWRVSAHENMI
PF3D7_0609800 251 NNILCWLCPFCVSNRPAGDGVRWRVSAHENPV
PRCDC_0608500 251 NNILCWLCPFCVSNRPAGDGVRWRVSAHENPV

```

**Supplementary Figure S2.** CLUSTAL W (1.83) multiple sequence alignment of DHHC2 from 7 *Plasmodium* species: PBANKA\_010830 *Plasmodium berghei* ANKA; PCHAS\_010890 *Plasmodium chabaudi chabaudi*; PY17X\_0109900 *Plasmodium yoelii yoelii* 17X; PKNH\_1140400 *Plasmodium knowlesi* strain H; PVX\_113640 *Plasmodium vivax* Sal-1; PF3D7\_0609800 *Plasmodium falciparum* 3D7; PRCDC\_0608500 *Plasmodium reichenowi* CDC. Asterisk indicate position of the signature DHHC motif.

|                      |     |                                                     |
|----------------------|-----|-----------------------------------------------------|
| TGGT1_278850         | 1   | MYHGSPMAPGLLYHQPCGYAPAPTGPPLPQYNAPRGSGSAPPQAGMTSH   |
| NCLIV_067160         | 1   | MYHGSPPLGPTMLYHQPDGYAPAPLGP-----APMAAASHQH          |
| EfaB_MINUS_7900.g824 | 1   | -----MYSPPVFTAVHCRAPTPQGPP-----VALGPPGAPSNGNRAAV    |
| PBANKA_010830        | 1   | -----MTHKYMQISHGQP-----                             |
|                      |     |                                                     |
| TGGT1_278850         | 51  | SALSPRGFPSPPTNRPATRVVPVSGAAG---TSRRSNGCFTFAVVLLLSF  |
| NCLIV_067160         | 39  | SSTSPRGYPASPTAARGPAGLVPSAPVGATPPRKSINACFTLAVVLLLSF  |
| EfaB_MINUS_7900.g824 | 40  | ASVSSAGVGNRMRTGGPEGVGSSGGLGSLSHRRMGSNGCFTFAVIFLMMFF |
| PBANKA_010830        | 14  | -----EKKRQGSIFIFIVFFILSF                            |
|                      |     |                                                     |
| TGGT1_278850         | 98  | LYLGYVFTLLAPLLWPIPSMLGSLVFAFHCCSEVLLLGAFLLKAVCTDPGR |
| NCLIV_067160         | 89  | LYLGYVFTLLAPLLWPIPSMLGSLVFAFHCCSEVLLLGAFLLKAVCTDPGR |
| EfaB_MINUS_7900.g824 | 90  | LYEGYLTLLLLPLHESWSMFSVGLFVLFHVLFCLEAAAFKAVCTDPGQ    |
| PBANKA_010830        | 33  | IYIGYTGIVLRSWFIPYRSGS-LTIAIVFHIFFCLELLSFTKCASTDPGK  |
|                      |     |                                                     |
|                      |     | ****                                                |
| TGGT1_278850         | 148 | VPANWGFYMGDENKRRRYCKVCNVWKPDRTHHCSCGRCVLNMDHHCPIW   |
| NCLIV_067160         | 139 | VPANWGFYMGDENKRRRYCKVCNVWKPDRTHHCSCGRCVLNMDHHCPIW   |
| EfaB_MINUS_7900.g824 | 140 | VPPHWGFYMGDESKRRRYCKVCNVWKPDRTHHCSCGRCVLNMDHHCPIW   |
| PBANKA_010830        | 82  | VPRNWGFYMGDVKRRRYCKVCNVWKPDRTHHCSCGRCVLNMDHHCPIW    |
|                      |     |                                                     |
| TGGT1_278850         | 198 | NNCVGFYNRKYFTQLLIYAIACLFFFIHGFYFIFVESIR--STQHTPTA   |
| NCLIV_067160         | 189 | NNCVGFYNRKYFTQLLIYAIACLFFFIHGFYFIFVESIR--STQPHS--   |
| EfaB_MINUS_7900.g824 | 190 | NNCVGFENRRFFLQLLIYAIACLTIIVFIHTPHHIFVSSFYGLAERVGGPP |
| PBANKA_010830        | 132 | NNCVGFYNRRFFLQLLIYGLICLFMVAQTQFHYIFIDNIN-----       |
|                      |     |                                                     |
| TGGT1_278850         | 246 | LEHSVLSYEPDASAVAVLKYYVVCMLLFFSMVLIFALIPFSRFHLNLVLR  |
| NCLIV_067160         | 235 | PEIHALPYQTETSAAAVLKYYVVCMLLFFSMVLIFALIPFSRFHLNLVLR  |
| EfaB_MINUS_7900.g824 | 240 | PGRTLPRGEYSPSAFKVTEYIYSCLILELFSMLIFALVPFTRFHLNLVLR  |
| PBANKA_010830        | 172 | --AYMDKGFQENS SFVALEYTVASIVLELIFVLIIFALVPFTKFHLKLSK |
|                      |     |                                                     |
| TGGT1_278850         | 296 | NSTTIENMDVANRDRNRVDLGVSRIEVOVFGSNPCWFVPAQFAANRPVG   |
| NCLIV_067160         | 285 | NSTTIENMDVANRDRNRVDLGVSRIEVOVFGSNPCWFVPAQFAANRPVG   |
| EfaB_MINUS_7900.g824 | 290 | NSSTIENMDQSNFDRNRVDLGVSRIEVOVFGSNPCWLLPETHAAGNRPVG  |
| PBANKA_010830        | 220 | NSTTIENMDIYHODYNTYNVGCEDNAKOVFGNNILCWMCPCHCISNRPAG  |
|                      |     |                                                     |
| TGGT1_278850         | 346 | DGVRWNHMYVADEHV-                                    |
| NCLIV_067160         | 335 | DGVRWNHMYVADEQV-                                    |
| EfaB_MINUS_7900.g824 | 340 | DGVRWNLHMYVAQDTEA                                   |
| PBANKA_010830        | 270 | DGVRWRVSMSSHCSNI--                                  |

**Supplementary Figure S3.** CLUSTAL W (1.83) multiple sequence alignment of *Plasmodium berghei* PBANKA\_010830 and proteins from three related apicomplexan species: TGGT1\_278850 *Toxoplasma gondii* GT1; NCLIV\_067160 *Neospora caninum* Liverpool; EfaB\_MINUS\_7900.g824 *Eimeria falciformis* Bayer Haberkorn 1970. Note the high sequence conservation surrounding the central DHHC motif which is located within the loop region between transmembrane domains 2 and 3. Asterisk indicate position of the signature DHHC motif.

**A**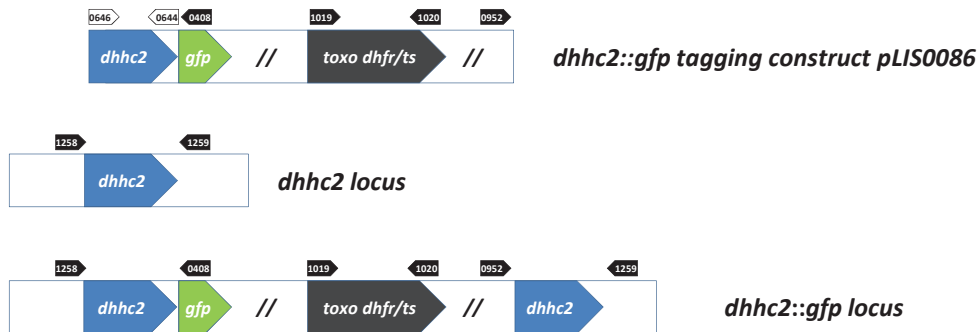**B**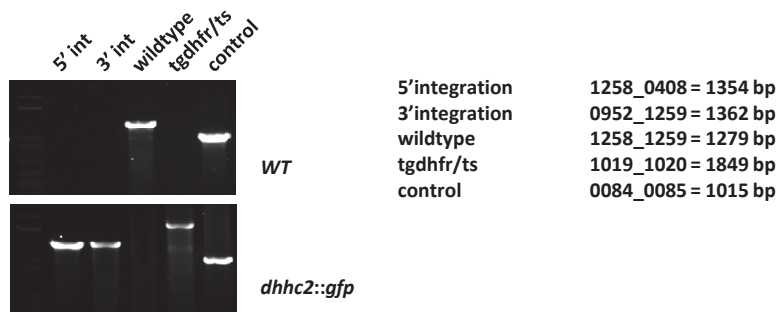

**Supplementary Figure S4. Generation and genotyping of *dhhc2::gfp* parasite line.** (A) *dhhc2* GFP tagging construct pLIS0086 was obtained by cloning the last 1167 bp of *dhhc2* ORF excluding the stop codon upstream and in frame with the *gfp* gene. This construct includes the *Toxoplasma gondii dhfr/ts* selectable marker cassette under the control of *P. berghei dhfr/ts* 5' and 3' UTRs. The construct was integrated into the *dhhc2* locus of cl15cy1 by single homologous recombination, resulting in the fusion of *dhhc2* to *gfp* in *dhhc2::gfp* parasites. (B) Correct tagging of *dhhc2* was shown by PCR genotyping analyses. PCR analyses confirm 5' and 3' integration (int.) of pLIS0086, absence of WT *dhhc2* ORF and presence of *tgdhfr/ts* gene. Primer combinations and expected amplicon sizes in basepairs (bp) are shown on the right.

**A**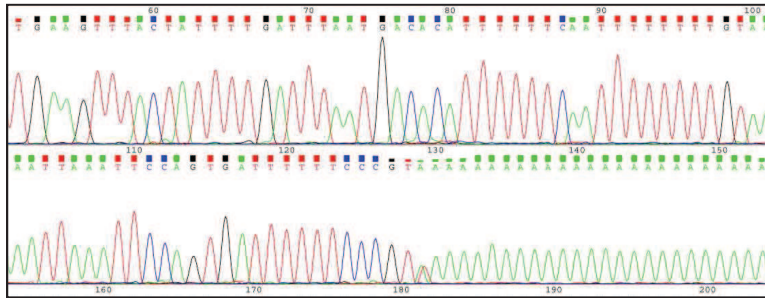**B**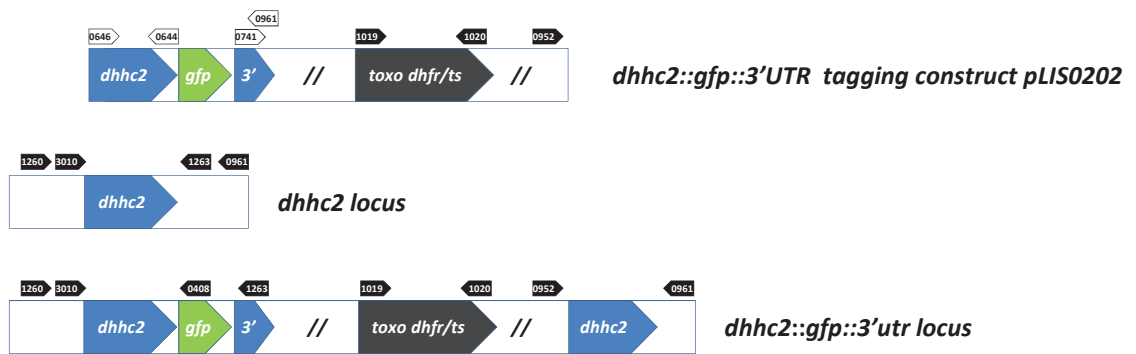**C**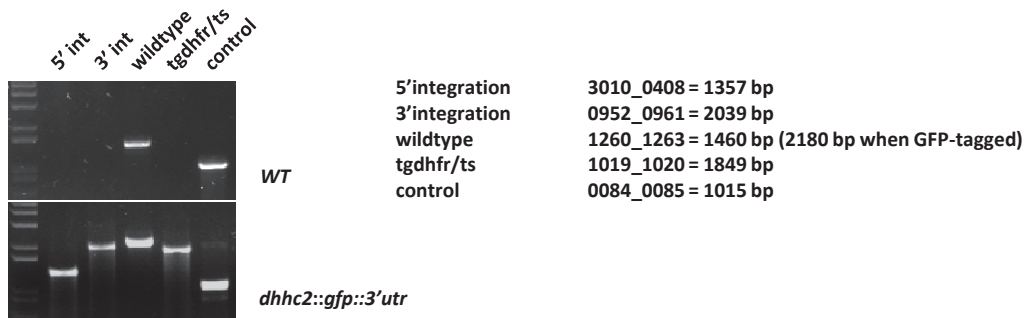**D**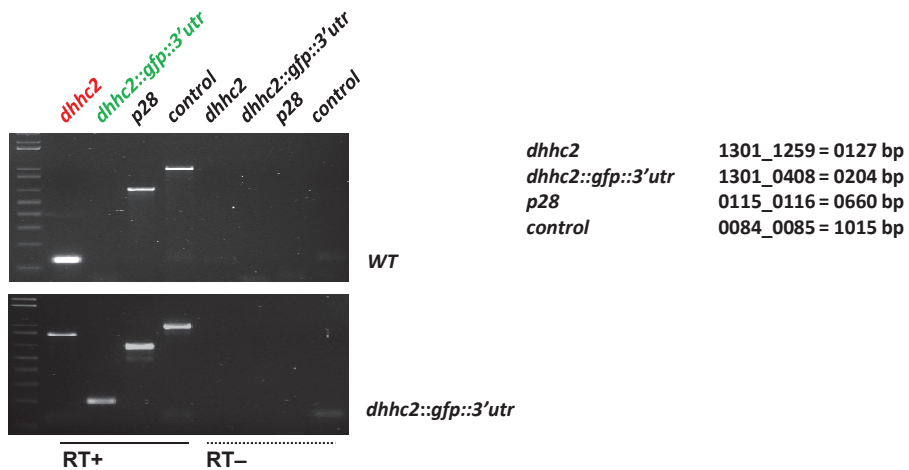

**Supplementary Figure S5. Generation and genotyping of *dhhc2::gfp::3'utr* parasite line.** (A) The chromatogram shows the sequencing result of a 3' RACE product allowing determination of the length of the 3'UTR of *dhhc2*. (B) *dhhc2* GFP tagging construct pLIS0202 was obtained by cloning the last 1167 bp of *dhhc2* ORF excluding the stop codon upstream and in frame with the GFP gene and nucleotide positions 36 to 541 of the *dhhc2* 3' UTR downstream of *gfp*. This construct includes the *Toxoplasma gondii* dhfr/ts selectable marker cassette under the control of *P. berghei* dhfr/ts 5' and 3' utrs. The construct was integrated into the *dhhc2* locus of *P. berghei* cl15cy1 by single homologous recombination, resulting in the fusion of *dhhc2* to *gfp* and maintaining the endogenous *dhhc2* 3' utr in *dhhc2::gfp-3'utr* parasites. (C) Correct tagging of *dhhc2* was shown by PCR genotyping analyses, confirming 5' and 3' integration (int.) of pLIS0202, absence of WT *dhhc2* ORF and presence of the *tgdhfr/ts* gene. (D) Absence of WT *dhhc2* and exclusive presence of *dhhc2::gfp* mRNA was confirmed in cloned *dhhc2::gfp-3'utr* mixed blood stages by RT-PCR.

DIC DHC2::GFP Nucleus

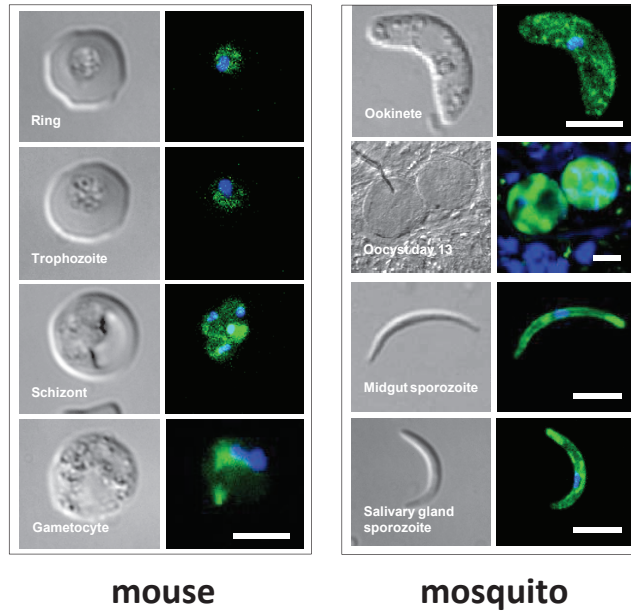

**Supplementary Figure S6. Expression of DHC2::GFP in *dhhc2::gfp::3'utr* parasites.** Scale bars = 5  $\mu$ m (blood stages, ookinetes and sporozoites) or 20  $\mu$ m (oocysts).



**Supplementary Figure S7.** Transcript levels as reads per kilobase of exon model per million mapped reads (RPKM). Ring 4-hour ring stage; troph 16-hour trophozoite; schizont 22-hour schizont; G gametocytes; O 24-hour ookinete; Otto et al. 2014

PBANKA\_140060 cytoadherence linked asexual protein, putative

|       |          |
|-------|----------|
| 4H R  | 209.626  |
| 16H T | 479.428  |
| 22H S | 2563.504 |
| G     | 26.995   |
| O     | 25.725   |

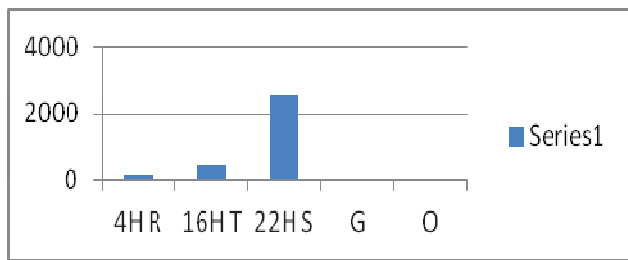

PBANKA\_010830 palmitoyltransferase, putative (DHHC2)

|       |         |
|-------|---------|
| 4H R  | 24.294  |
| 16H T | 3.636   |
| 22H S | 255.355 |
| G     | 283.007 |
| O     | 29.628  |

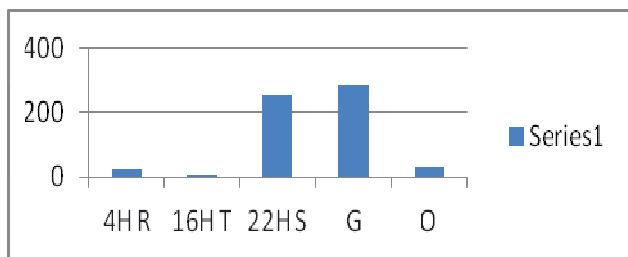

**A**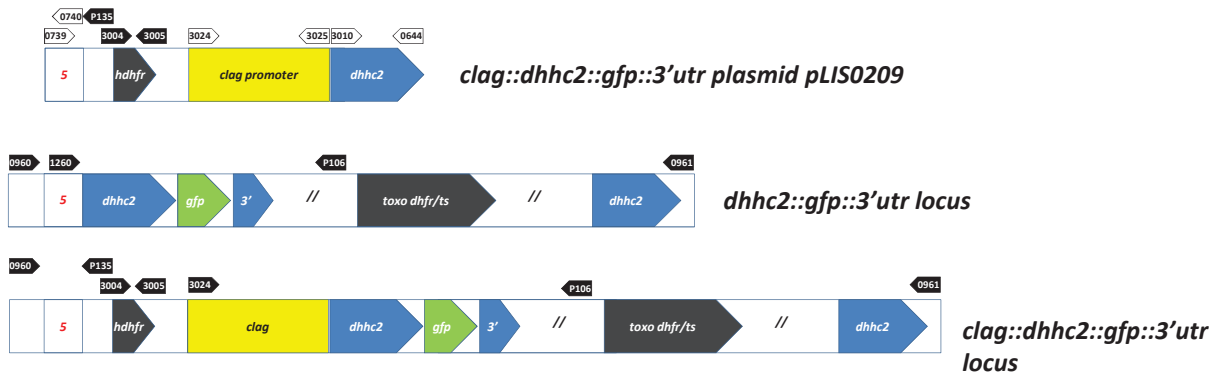**B**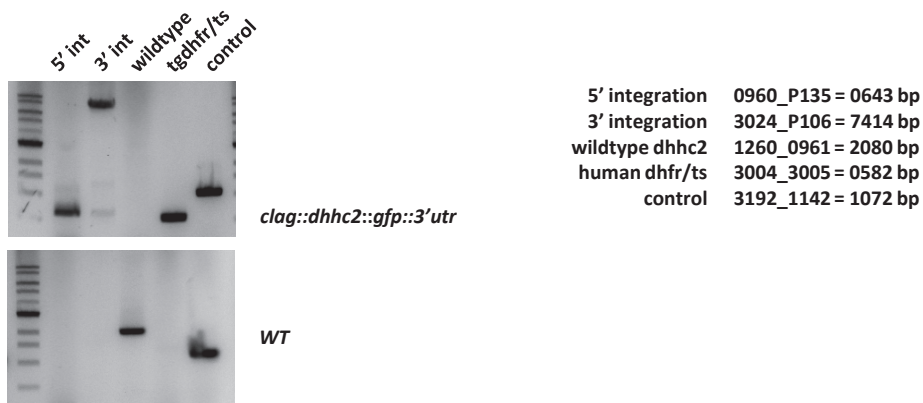

**Supplementary Figure S8. Generation and genotyping of the *clag::dhhc2::gfp::3'utr* parasite line. (A)** The *dhhc2* GFP promoter swap construct pLIS0209 was obtained by cloning the *clag* promoter in front of the *dhhc2* ORF. The human *dhfr* selectable marker cassette under the control of *P. berghei ef1a* 5' and 3' UTRs is further flanked upstream by *dhhc2* upstream region and is thus integrated into the *dhhc2* locus of *dhhc2::gfp::3'utr* by double homologous recombination, resulting in the exchange of the endogenous *dhhc2* promoter for the *clag* promoter. **(B)** Correct promoter swap of *dhhc2* was shown by PCR genotyping analyses, confirming 5' and 3' integrations (int.) of pLIS0209, absence of WT *dhhc2* gene, and presence of the human *dhfr* gene.

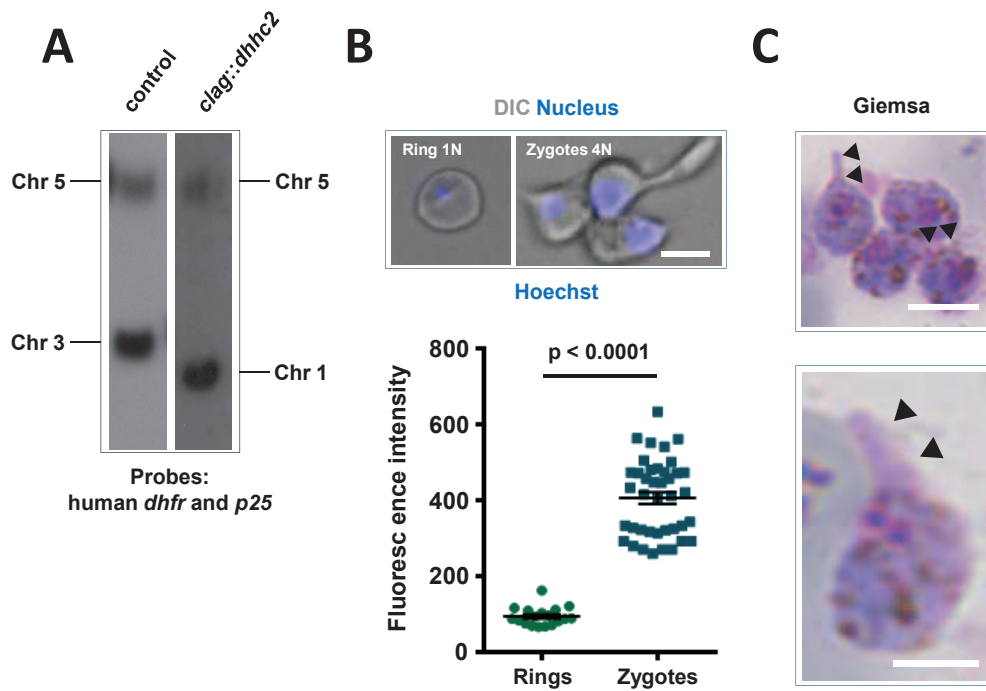

**Supplementary Figure S9. *clag::dhhc2* parasites (parental line: wildtype) are capable of normal fertilization but fail to form ookinetes, replicating the phenotype of *clag::dhhc2::gfp::3'utr* mutants. (A)** Construct pLIS0209 was integrated into the *dhhc2* locus of parental wildtype reference line 676m1c1 by double homologous recombination, resulting in the exchange of the endogenous *dhhc2* promoter for the *clag* promoter. Correct promoter swapping was shown by Southern analysis of separated chromosomes. Hybridisation of separated chromosomes was done with a mixture of two probes: one against the human *dhfr*, recognising integrated pLIS0209 into chromosome 1, and another against the gene *p25* on chromosome 5. As control, a transgenic parasite line containing the human *dhfr* in the *p230p* locus on chromosome 3 was used. **(B)** Live imaging of Hoechst-stained ring stage and zygotes of the *dhhc2* promoter swap line (scale bar=5  $\mu$ m), and quantification of DNA content. Nuclear DNA content of asexual blood stage rings (haploid DNA content, 1N) and zygotes (tetraploid DNA content, 4N) was determined by Hoechst-fluorescence intensity measurements. The mean fluorescence intensity of ring-form nuclei (1N) is 94 (n=18) and of zygotes (4N) is 406 (n=40). Mean  $\pm$  SEM values and p-value for Student's t-test are shown. **(C)** Giemsa staining of overnight ookinete cultures reveals 2-BMP-like morphological defects in mutant zygotes displaying thin protrusions (arrowheads). Scale bars=5  $\mu$ m.

**Table S1a - Primers used in the present work.**

**a) Primers used in life-cycle RT-PCRs, RT-PCRs of IP samples and 3'RACE**

“c” or “Rev” at the end of primer names means they are antisense primers. All others are sense primers.

Nucleotide stretches in capital letter correspond to the complementary sequence to the respective gene.

n.a.: not applicable

| Gene name       | Gene ID       | Primer name | Sequence                            | Description        |
|-----------------|---------------|-------------|-------------------------------------|--------------------|
| <i>dhhc2</i>    | PBANKA_010830 | g0646       | aaagaattcTCGATATTCATATTTATTG        | <i>dhhc2</i> ORF   |
|                 |               | g0644c      | aaagcggccgcATATATTACTTCCATGTG       | <i>dhhc2</i> ORF   |
| <b>18S rRNA</b> | n.a.          | PbA18SFw    | AAGCATTAAATAAAGCGAATACATCCTTAC      | 18S rRNA           |
|                 |               | PbA18SRev   | GGAGATTGGTTTTGACGTTTATGTG           | 18S rRNA           |
| <i>hsp70</i>    | PBANKA_071190 | g0258       | AAAAGCAAAGCCAACTTACC                | <i>hsp70</i> ORF   |
|                 |               | g0259c      | GGATGGGGTTGTTCTATTACC               | <i>hsp70</i> ORF   |
| <i>p25</i>      | PBANKA_051500 | g0385       | CCGGAATTCATAAACAATATACCTGG          | <i>p25</i> 3' UTR  |
|                 |               | g0476c      | CGGGATCCTCATACGAATTTTATTG           | <i>p25</i> 3' UTR  |
| <i>p28</i>      | PBANKA_051490 | g0115       | TTCGATATCATGAATTTTAAATACAG          | <i>p28</i> ORF     |
|                 |               | g0116c      | tccgcgccgcGCATTACTATCACGTAATAAC     | <i>p28</i> ORF     |
| <i>dozi</i>     | PBANKA_121770 | g0546       | TAATTGTGTCGCTTCAAATG                | <i>dozi</i> ORF    |
|                 |               | g0548c      | TAATTCTTTTATCATAGCAG                | <i>dozi</i> ORF    |
| <i>cith</i>     | PBANKA_130130 | g0549       | GAAAAAAGCAAAGATGTATTATCTG           | <i>cith</i> ORF    |
|                 |               | g0550c      | ATAGGCTGGGTATCTGTAAATG              | <i>cith</i> ORF    |
| <i>alba3</i>    | PBANKA_120440 | g0003       | aaaccggggaattcCAAGAAAGAGCTGAAAAC    | <i>alba3</i> ORF   |
|                 |               | g0004c      | aaagcggccgctATTAGCAACAAAGTTTG       | <i>alba3</i> ORF   |
| <i>dhhc2</i>    | PBANKA_010830 | g3315       | TAATGCAAAACAGGTTTTTGG               | <i>dhhc2</i> ORF   |
|                 |               | g1301       | CATTGTATTTCAAATAGACC                | <i>dhhc2</i> ORF   |
|                 |               | g3318       | CAATACTTTTCAGTAATAAAAATG            | <i>dhhc2</i> 3'utr |
|                 |               | g3319       | AAATCACTGGAATTTAATTTTAC             | <i>dhhc2</i> 3'utr |
| <b>n/a</b>      | oligo d(T)    | g0357c      | GCTGCAAGTGAACATCTGTTTTTTTTTTTTTTTTT | <i>poly(A)</i>     |

## Table S1b - Primers used in the present work.

### b) Primers used in the generation of gene deletion and GFP-tagging constructs.

“c” at the end of primer names means they are antisense primers. All others are sense primers.

ORF: open reading frame; UTR: untranslated region.

| Gene name                       | Gene ID       | Construct name | Primer name | Sequence                           | Restriction sites |
|---------------------------------|---------------|----------------|-------------|------------------------------------|-------------------|
| <b>Gene deletion constructs</b> |               |                |             |                                    |                   |
| <i>dhhc2</i>                    | PBANKA_010830 | pLIS0065       | g0739       | aaaggtaccTTTATTATTTGAGTGTTG        | <i>Asp718I</i>    |
|                                 |               |                | g0740c      | aaaaagcttTTTATATTGATTTTGATTG       | <i>HindIII</i>    |
|                                 |               |                | g0741       | aaagaattcTTGAGTTTATAAATATGTC       | <i>EcoRI</i>      |
|                                 |               |                | g0742c      | aaagcgccgcATATCCTAAAACTATTG        | <i>NotI</i>       |
| <b>GFP-tagging constructs</b>   |               |                |             |                                    |                   |
| <i>dhhc2</i>                    | PBANKA_010830 | pLIS0086       | g0646       | aaagaattcTCGATATTCATATTTATTG       | <i>EcoRI</i>      |
|                                 |               |                | g0644c      | aaagcgccgcATATATTACTTCCATGTG       | <i>NotI</i>       |
|                                 |               | pLIS0202       | g0646       | aaagaattcTCGATATTCATATTTATTG       | <i>EcoRI</i>      |
|                                 |               |                | g0644c      | aaagcgccgcATATATTACTTCCATGTG       | <i>NotI</i>       |
|                                 |               |                | g0741       | aaagaattcTTGAGTTTATAAATATGTC       | <i>EcoRI</i>      |
|                                 |               |                | g0742c      | aaagcgccgcATATCCTAAAACTATTG        | <i>NotI</i>       |
| <b>Promoter swap construct</b>  |               |                |             |                                    |                   |
| <i>dhhc2</i>                    | PBANKA_010830 | pLIS209        | g3010       | aaaactagtATGACACATAAATATATGCAGATAT | <i>SpeI</i>       |
|                                 |               |                | g0644c      | aaagcgccgcATATATTACTTCCATGTG       | <i>NotI</i>       |
| <i>clag</i>                     | PBANKA_140060 |                | g3024       | aaacgatcgCTGATATTTATGAGTATTCC      | <i>PvuI</i>       |
|                                 |               |                | g3025c      | aaatctagaTATATTACGAATTGACACC       | <i>XbaI</i>       |

**Table S1c - Primers used in the present work.**

**c) Primers used in genotyping and RT-PCR of mutant parasite lines.**

“c” at the end of primer names means they are antisense primers. All others are sense primers.

Nucleotide stretches in capital letter correspond to the complementary sequence to the respective gene.

n.a.: not applicable; ORF: open reading frame; UTR: untranslated region.

| Gene name/<br>mutant name      | Gene ID       | Primer name | Sequence                        |
|--------------------------------|---------------|-------------|---------------------------------|
| <b>Primers for genotyping</b>  |               |             |                                 |
| <i>dhhc2::gfp</i>              |               | g1258       | ACACATAAATATATGCAG              |
|                                |               | g1259c      | ATGACATATTATAAACTC              |
|                                |               | 3010        | ATGACACATAAATATATGCAGATAT       |
| <i>dhhc2::gfp</i> -3'UTR       | PBANKA_010830 | g0961c      | GAGAATTAAGCCTATATATAC           |
|                                |               | g1260       | TGAGGAGAATATTATAAG              |
|                                |               | g1263c      | AATGCTATTGCATATTTG              |
|                                |               | g1258       | ACACATAAATATATGCAG              |
| <i>dhhc2</i>                   |               | g1259c      | ATGACATATTATAAACTC              |
|                                |               | g1260       | TGAGGAGAATATTATAAG              |
|                                |               | g1263c      | AATGCTATTGCATATTTG              |
| <b>Primers for RT-PCR</b>      |               |             |                                 |
| <i>dhhc2</i>                   |               | g1261       | AATATATGCAGATATCAC              |
|                                |               | g1262c      | AAAAAATATACTTGTGC               |
|                                |               | g1301       | CATTGTATTTCAAATAGACC            |
| <i>dhhc2::gfp</i>              | PBANKA_010830 | g1259c      | ATGACATATTATAAACTC              |
|                                |               | g1258       | ACACATAAATATATGCAG              |
|                                |               | g1301       | CATTGTATTTCAAATAGACC            |
| <i>dhhc2::gfp</i> -3'UTR       |               | g1301       | CATTGTATTTCAAATAGACC            |
|                                |               | g1259c      | ATGACATATTATAAACTC              |
| <b>General primers</b>         |               |             |                                 |
| <i>pbdhfr/ts</i>               | PBANKA_071930 | g0952       | GATTCATAAATAGTTGGACTTG          |
|                                |               | P106        | GTCCATACAACTATATCCGAAC          |
| <i>tgdhfr/ts</i>               | n.a.          | g1019       | ATGCATAAACCGGTGTGTC             |
|                                |               | g1020c      | AGCTTCTGTATTTCCGC               |
| RNA polymerase II subunit RPB1 | PBANKA_080700 | g0084       | aaagaattcTGATGGTTTACAATCACC     |
|                                |               | g0085c      | aaagcgccgctTTCTTCCTGCATCTCCTC   |
| <i>p28</i>                     | PBANKA_051490 | g0115       | TTCGATATCATGAATTTTAAATACAG      |
|                                |               | g0116c      | tccgcgccgcGCATTACTATCACGTAATAAC |
| <i>gfp</i>                     | n.a.          | g0408c      | GTATGTTGCATCACCTTC              |
| <i>ef1a</i>                    | PBANKA_113330 | P135        | GTAAACTTAAGCATAAAGAGCTCG        |
| <i>human dhfr</i>              | n.a.          | g3004       | AAAAGATCTATGGTTGGTTCGCTAAACTG   |
| <i>human dhfr</i>              | n.a.          | g3005       | AAACAATTGTTAATCATTCTTCTCATATAC  |

**Supplementary Table S2.** Parasite transfection experiments overview

| Gene name/<br>mutant name                  | Gene ID       | DNA construct<br>name | Restriction<br>enzymes <sup>1</sup> | Experiment #/<br>mutant clone ID <sup>2</sup> | Parental line <sup>3</sup> |
|--------------------------------------------|---------------|-----------------------|-------------------------------------|-----------------------------------------------|----------------------------|
| <b>Unsuccessful gene deletion attempts</b> |               |                       |                                     |                                               |                            |
| <i>dhhc2</i>                               | PBANKA_010830 | pLIS0065              | <i>Asp718I</i> and <i>NotI</i>      | 2095                                          | 820cl1m1cl1                |
|                                            |               |                       |                                     | 2362, 2363                                    | 676m1cl1                   |
| <b>GFP-tagged mutants</b>                  |               |                       |                                     |                                               |                            |
| <i>dhhc2::gfp</i>                          | PBANKA_010830 | pLIS0086              | <i>FspAI</i>                        | 2185cl1m1                                     | cl15cy1                    |
| <i>dhhc2::gfp-3'utr</i>                    | PBANKA_010830 | pLIS0202              | <i>BsmI</i>                         | 202cl1m1                                      | cl15cy1                    |
| <b>Promoter swap</b>                       |               |                       |                                     |                                               |                            |
| <i>clag::dhhc2::gfp::3'utr</i>             | PBANKA_010830 | pLIS209               | <i>KpnI</i> , <i>BglI</i>           | 209cl2                                        | 202cl1m1                   |
| <i>clag::dhhc2</i>                         | PBANKA_010830 | pLIS209               | <i>KpnI</i> , <i>BamHI</i>          | 2593                                          | 676cl1m1                   |

<sup>1</sup> Restriction enzymes used for plasmid linearisation before transfection

<sup>2</sup> Experiment number for independent transfection experiments:  
the unsuccessful attempts and the experiment number/ID of the mutants clones

<sup>3</sup> Parental *P. berghei* ANKA line in which the transfection experiment was performed
